# Supplementary material
Source: MDPI journal article supplement (https://www.mdpi.com/2304-6740/7/6/70)
Supplement: s1 [file s1]

No syntax errors found.  
Please wait while processing ....

[CIF dictionary](#)  
[Interpreting this report](#)

## Datablock: shelx

---

|                 |                                            |                    |
|-----------------|--------------------------------------------|--------------------|
| Bond precision: | Ag-Ag = 0.0020 A                           | Wavelength=0.71073 |
| Cell:           | a=4.6178(19)    b=16.014(7)    c=18.644(8) |                    |
|                 | alpha=90    beta=90    gamma=90            |                    |
| Temperature:    | 293 K                                      |                    |

  

|                | Calculated          | Reported       |
|----------------|---------------------|----------------|
| Volume         | 1378.7(10)          | 1378.7(10)     |
| Space group    | C m c m             | C m c m        |
| Hall group     | -C 2c 2             | -C 2c 2        |
| Moiety formula | Ag6 Pr4 Te10, 2(Rb) | ?              |
| Sum formula    | Ag6 Pr4 Rb2 Te10    | Ag3 Pr2 Rb Te5 |
| Mr             | 2657.80             | 1328.90        |
| Dx,g cm-3      | 6.402               | 6.402          |
| Z              | 2                   | 4              |
| Mu (mm-1)      | 24.945              | 24.946         |
| F000           | 2224.0              | 2224.0         |
| F000'          | 2198.36             |                |
| h,k,lmax       | 5,19,22             | 5,19,22        |
| Nref           | 774                 | 774            |
| Tmin,Tmax      | 0.103,0.083         | 0.273,0.746    |
| Tmin'          | 0.066               |                |

Correction method= # Reported T Limits: Tmin=0.273  
Tmax=0.746 AbsCorr = MULTI-SCAN  
Data completeness= 1.000    Theta(max)= 25.763  
R(reflections)= 0.0360( 692)    wR2(reflections)= 0.0820( 774)  
S = 1.159    Npar= 37

---

The following ALERTS were generated. Each ALERT has the format  
**test-name\_ALERT\_alert-type\_alert-level**.  
Click on the hyperlinks for more details of the test.

### Alert level G

|                                   |                                                  |      |             |
|-----------------------------------|--------------------------------------------------|------|-------------|
| <a href="#">PLAT004_ALERT_5_G</a> | Polymeric Structure Found with Maximum Dimension | 2    | Info        |
| <a href="#">PLAT005_ALERT_5_G</a> | No Embedded Refinement Details Found in the CIF  |      | Please Do ! |
| <a href="#">PLAT045_ALERT_1_G</a> | Calculated and Reported Z Differ by a Factor ... | 0.50 | Check       |
| <a href="#">PLAT199_ALERT_1_G</a> | Reported _cell_measurement_temperature ..... (K) | 293  | Check       |
| <a href="#">PLAT200_ALERT_1_G</a> | Reported _diffrn_ambient_temperature ..... (K)   | 293  | Check       |
| <a href="#">PLAT794_ALERT_5_G</a> | Tentative Bond Valency for Pr1 (III) .           | 2.84 | Info        |
| <a href="#">PLAT883_ALERT_1_G</a> | No Info/Value for _atom_sites_solution_primary . |      | Please Do ! |

---

- 0 **ALERT level A** = Most likely a serious problem - resolve or explain  
0 **ALERT level B** = A potentially serious problem, consider carefully  
0 **ALERT level C** = Check. Ensure it is not caused by an omission or oversight  
7 **ALERT level G** = General information/check it is not something unexpected
- 4 ALERT type 1 CIF construction/syntax error, inconsistent or missing data  
0 ALERT type 2 Indicator that the structure model may be wrong or deficient  
0 ALERT type 3 Indicator that the structure quality may be low  
0 ALERT type 4 Improvement, methodology, query or suggestion  
3 ALERT type 5 Informative message, check
- 

It is advisable to attempt to resolve as many as possible of the alerts in all categories. Often the minor alerts point to easily fixed oversights, errors and omissions in your CIF or refinement strategy, so attention to these fine details can be worthwhile. In order to resolve some of the more serious problems it may be necessary to carry out additional measurements or structure refinements. However, the purpose of your study may justify the reported deviations and the more serious of these should normally be commented upon in the discussion or experimental section of a paper or in the "special\_details" fields of the CIF. checkCIF was carefully designed to identify outliers and unusual

parameters, but every test has its limitations and alerts that are not important in a particular case may appear. Conversely, the absence of alerts does not guarantee there are no aspects of the results needing attention. It is up to the individual to critically assess their own results and, if necessary, seek expert advice.

### Publication of your CIF in IUCr journals

A basic structural check has been run on your CIF. These basic checks will be run on all CIFs submitted for publication in IUCr journals (*Acta Crystallographica*, *Journal of Applied Crystallography*, *Journal of Synchrotron Radiation*); however, if you intend to submit to *Acta Crystallographica Section C* or *E* or *IUCrData*, you should make sure that [full publication checks](#) are run on the final version of your CIF prior to submission.

### Publication of your CIF in other journals

Please refer to the *Notes for Authors* of the relevant journal for any special instructions relating to CIF submission.

---

PLATON version of 17/03/2019; check.def file version of 04/03/2019

### Datablock shelx - ellipsoid plot

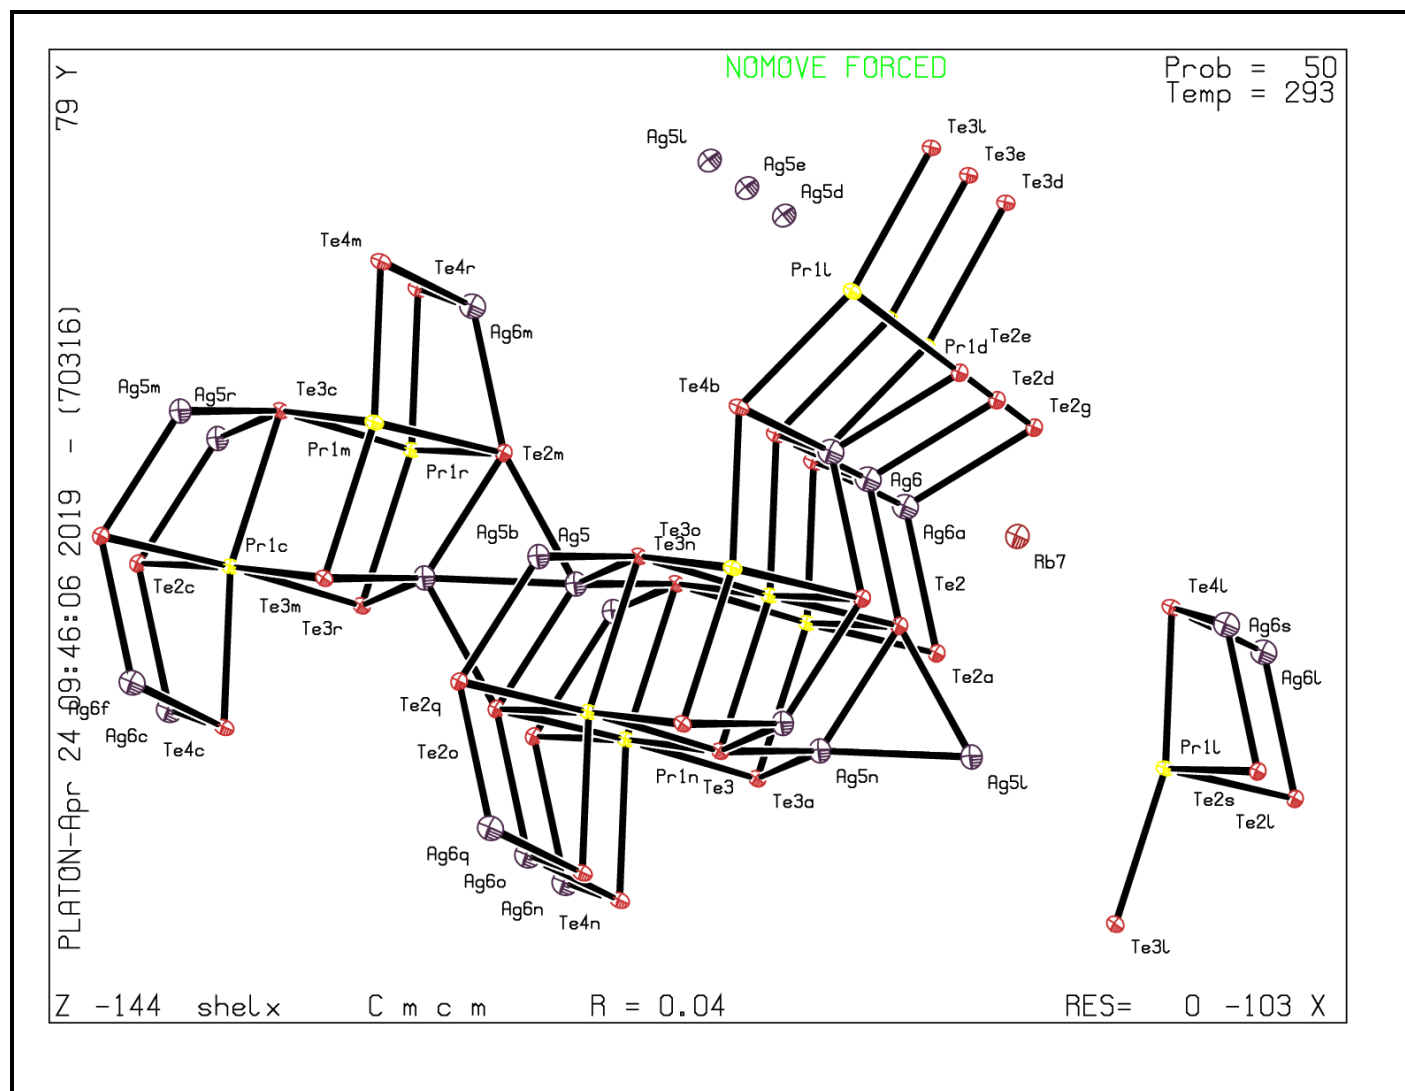

[Download CIF editor \(publCIF\) from the IUCr](#)  
[Download CIF editor \(enCIFer\) from the CCDC](#)  
[Test a new CIF entry](#)
